# Supplementary material for: Recycling diaper waste for the fabrication of flexible supercapacitors and the role of lead ferrite (PbFe11CrO19) in enhancing their capacitance
Source: Royal Society of Chemistry journal article supplement (doi:10.1039/d2nj03707f), 2022-01-01
Supplement: d2nj03707f1.pdf [file d2nj03707f1.pdf]

## Supporting Information

### Recycling diapers' waste for the fabrication of flexible supercapacitors and the role of the lead ferrite ( $\text{PbFe}_{11}\text{CrO}_{19}$ ) to enhance their capacitance

Ricardo Mendoza-Jiménez, Jorge Oliva, Arturo Isaias Mtz-Enriquez, Vicente  
Rodriguez-Gonzalez and Sergio Diaz-Castañón

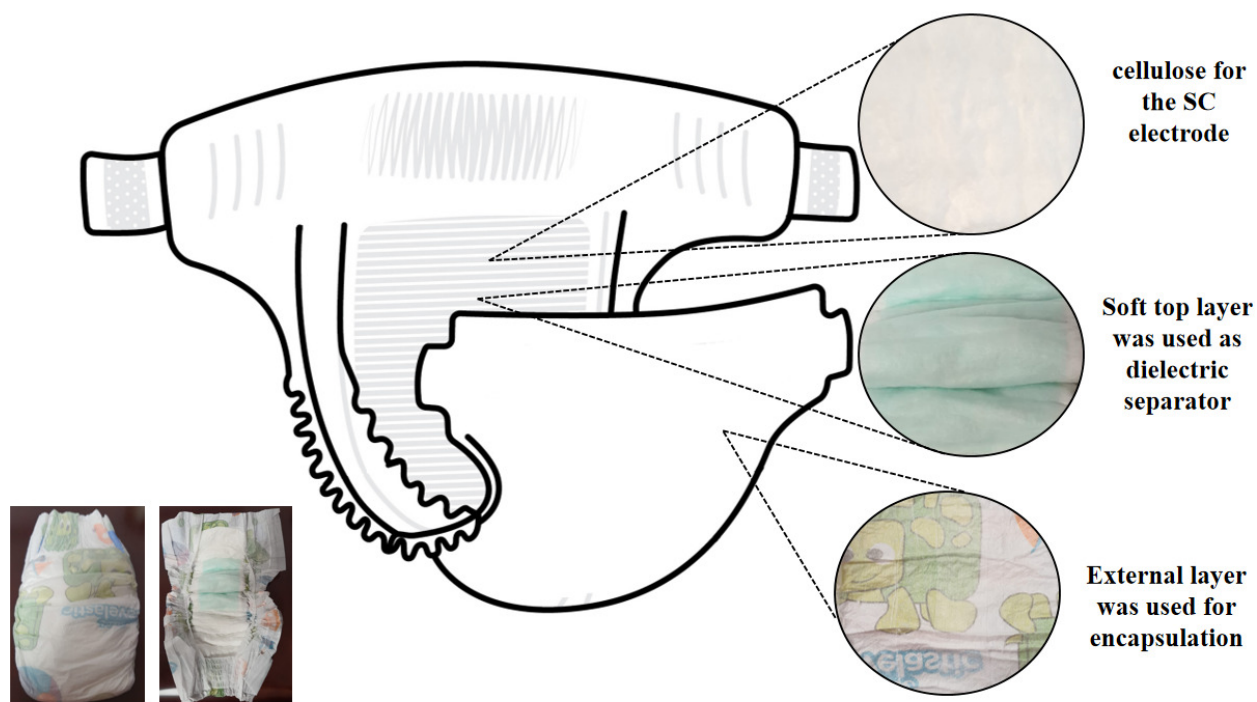

**Figure S1.** Schematic illustration of the diaper showing the parts taken to construct the solid state supercapacitor.

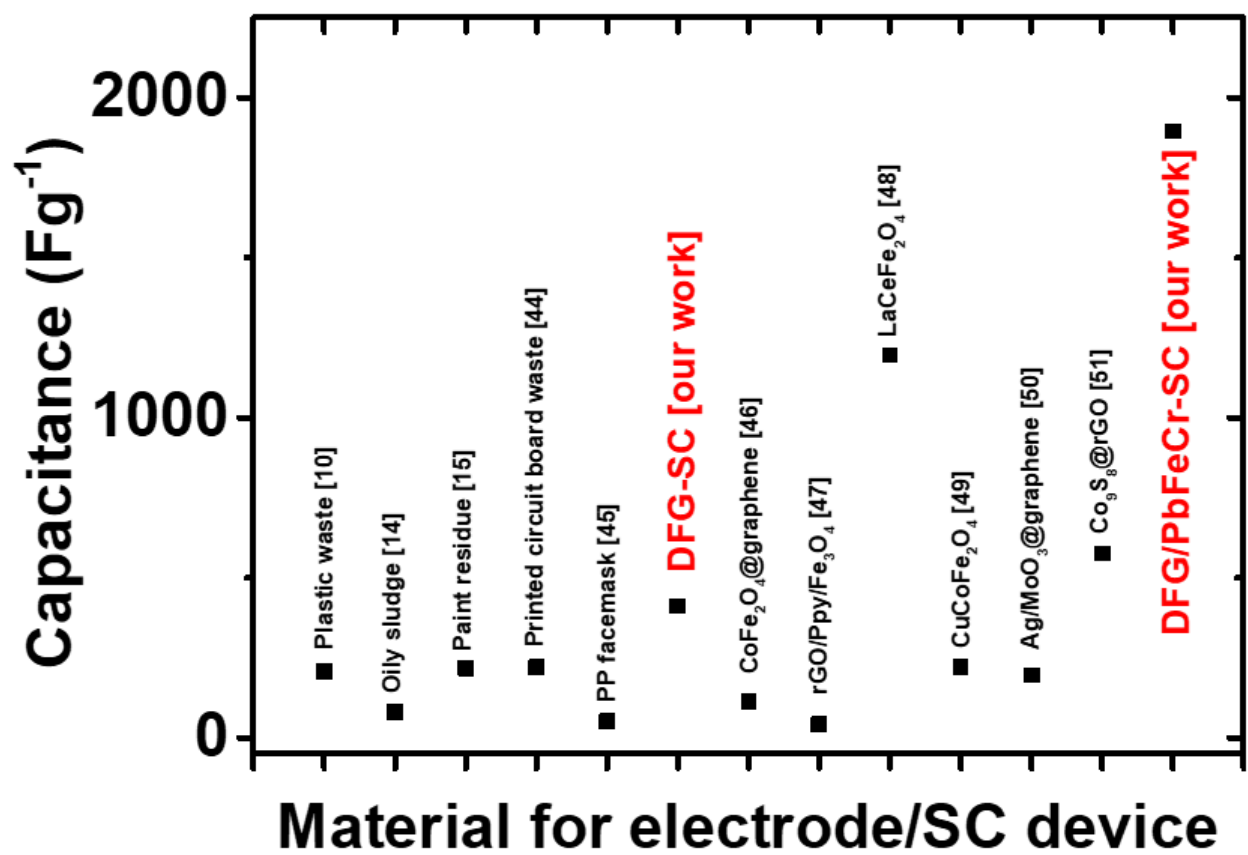

Figure S2. Specific Capacitances for materials previously reported.

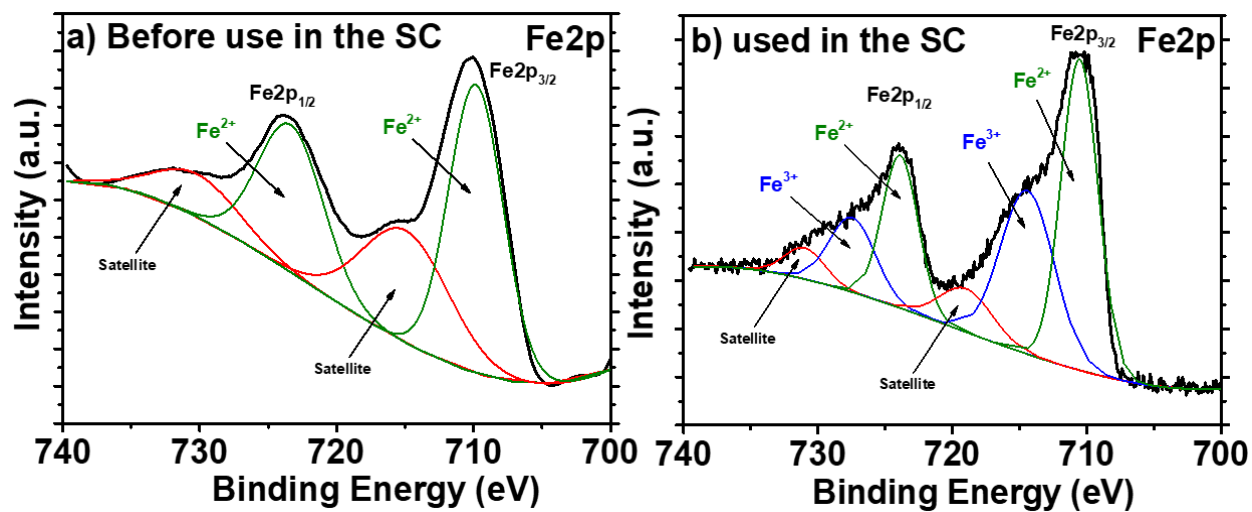

**Figure S3.** XPS spectra (Fe2p orbital) for the DFG/PbFeCr electrode a) before and b) after its use in the SC.
